# Supplementary material for: Association of Lipids, Lipoproteins, and Apolipoproteins with Stroke Subtypes in an International Case Control Study (INTERSTROKE)
Source: PubMed Central journal article supplement — J Stroke. 2022 May 31;24(2):224–35. doi: 10.5853/jos.2021.02152 (PMC9194539; doi:10.5853/jos.2021.02152), 2022-05-31
Supplement: jos-2021-02152-app1.pdf [file jos-2021-02152-app1.pdf]

## Appendix 1. INTERSTROKE project office staff, national coordinators, investigators and key staff

Project office staff (Population Health Research Institute, Hamilton Health Sciences and McMaster University, Hamilton, ON, Canada): Coordination and Data Management: M. O'Donnell, S. Yusuf (Principal Investigators) S. Rangarajan (Project Manager); P. Rao-Melacini, X. (Michelle) Zhang, S. Islam, C. Kabali, A. Casanova (Statisticians); S.L. Chin, J. DeJesus (Study Coordinator), M. Dehghan (Nutritionist), S. Agapay.

Core laboratories: M. McQueen, K. Hall, J. Keys (Hamilton), X. Wang (Beijing, China), A. Devanath (Bangalore, India), R. Gupta, D. Prabhakaran (New Delhi, India)

Argentina: R. Diaz\*, P. Schygiel, M. Garrote, M.A. Rodriguez, A. Caccavo, R.G. Duran, L. Sposato, J. Molinos, P. Valdez, C.M. Cedrolla, P.G. Nofal, M.F. Huerta, P.M. Desmery, M.C. Zurru, B. Della Vedova; Australia: J. Varigos\*, G. Hankey\*, T. Kraemer, P. Gates, C. Bladin, G. Herkes; Brazil: A. Avezum\*, M.P. Pereira, L. Minuzzo, L. Oliveira, M. Teixeira, H. Reis, A. Carvalho, S. Ouriques Martins, J.J. Carvalho, O. Gebara, C. Minelli, D.C. Oliveira, A.C. Sobral Sousa, A.C. Ferraz de Almeida, M.E. Hernandez, M. Friedrich, D.M. Mota, L.E. Ritt, D. Correa Vila Nova; Canada: M. O'Donnell\*, S. Yusuf, P. Teal, D. Gladstone, A. Shuaib, F. Silver, D. Dowlatsahi, J. DeJesus, S. Rangarajan, S. Agapay, S.L. Chin; Chile: F. Lanas\*, D. Carcamo, C. Santibañez, E. Garces; China: L.S. Liu\*, H.Y. Zhang\*, H.P. Fang, M.F. Lian, F. Shen, F.X. Luo, X.X. Wen, Z.Q. Xu, Z.Z. Liu, W. Yan, J.F. Yu, W.K. Wang, L.H. Liu, Y.H. Sun, L.C. Zhou, Z.F. Zhang, J. Lv, C.S. Zhang, G. Chen, H.L. Wang, Y. Chen, H. Zheng, J.J. Huang, W.Z. Li, L.J. Wang, J.X. Shi, C.Y. Hu, H.F. Song, R.Y. Ji, D.L. Wang, L.H. Meng, Q.W. Meng, L.J. Duan, H.F. Liu, Y.C. Luo, Q.Y. Zhang, Y.B. Wu, C.R. Wang, J.G. Zhao, S.G. Liu, C.L. Shi, X.Y. Wang; Colombia: P. Lopez-Jaramillo\*, A. Martinez, G. Sanchez-Vallejo, D.I. Molina, T. Espinosa, H. Garcia Lozada, D. Gomez-Arbelaez, P.A. Camacho; Croatia: Z. Rumboldt\*, I. Lusic; Denmark: H.K. Iversen\*, T. Truelsen, C. Back, M.M. Pedersen; Ecuador: E. Peñaherrera\*, Y.C. Duarte, S. Cevallos, D. Tettamanti, S. Caceres; Germany: H.C. Diener\*, C. Weimar, A. Grau, J. Rother, M. Ritter, T. Back, Y. Winter; India: P. Pais\*, D. Xavier\* (co-principal investigator for INTERSTROKE), A. Sigamani, N. Mathur, P. Rahul, A. Murali, A.K. Roy, G.R.K. Sarma, T. Matthew, G. Kusumkar, K.A. Salam, U. Karadan, L. Achambat, Y. Singh, J.D. Pandian, R. Verma, V. Atam, A. Agarwal, N. Chidambaram, R. Umarani, S. Ghanta, G.K. Babu, G. Sathyanaraya-

na, G. Sarada, S. Navya Vani, R. Sundararajan, S.S. Sivakumar, R.S. Wadia, S. Bandishti, R. Gupta, R.R. Agarwal, I. Mohan, S. Joshi, S. Kulkarni, S. Partha Saradhi, P. Joshi, M. Pandharipande, N. Badnerkar, R. Joshi, S.P. Kalantri, S. Somkumar, S. Chauhan, H. Singh, S. Varma, H. Singh, G.K. Sidhu, R. Singh, K.L. Bansal, A. Bharani, S. Pagare, A. Chouhan, B.N. Mahanta, T.G. Mahanta, G. Rajkonwar, S.K. Diwan, S.N. Mahajan, P. Shaikh, H.R. Devedrappa, B.K. Agrawal, A. Agrawal, D. Khurana, S. Thakur, V. Jain; Iran: S. Oveisgharan\*, A. Bahonar, R. Kelishadi, A. Hossienzadeh, M. Raeisidehkordi, H. Akhavan; Ireland: M. O'Donnell\*, T. Walsh; Kuwait: O. Albaker\*; Malaysia: K. Yusoff\*, A. Chandramouli, S. Shahadan, Z. Ibrahim, A. Husin; Mozambique: A. Damasceno\*, V. Lobo, S. Loureiro, V.A. Govo; Nigeria: O.S. Ogah\*, A. Ogunniyi\*, R.O. Akinyemi, M.O. Owolabi, M.U. Sani, L.F. Owolabi; Pakistan: R. Iqbal\*, M. Wasay, A. Raza; Peru: G.G. Malaga\*, M. Lazo-Porras, J.D. Loza-Herrera, A. Acuña-Villaorduña, D. Cardenas-Montero; Philippines: A. Dans\*, E. Collantes, D. Morales, A. Roxas, M.V.C. Villarruz-Sulit; Poland: A. Czlonkowska\*, D. Ryglewicz\*, M. Skowronska, M. Restel, A. Bochynska, K. Chwojnicki, M. Kubach, A. Stowik, M. Wnuk; Russia: N. Pogosova\*, A. Ausheva, A. Karpova, V. Pshenichnikova, A. Vertkin; A. Kursakov, S. Boytsov; Saudi Arabia: F. Al-Hussain\*; South Africa: L. DeVilliers\*, D. Magazi, B. Mayosi; Sudan: A.S.A. Elsayed\*, A. Bukhari, Z. Sawaraldahab, H. Hamad, M. ElTaher, A. Abdelhameed, M. Alawad, D. Alkabashi, H. Alsir; Sweden: A. Rosengren\*, M. Andreasson, J. Kembro Johansson, B. Cednerin, C. Schander, A.C. Elgasen, E. Bertholds, K. Boström Bengtsson; Thailand: Y. Nilanont\*, S. Nidhinandana\*, P. Tatsanavivat, N. Prayoonwiwat, N. Pongvarin, N.C. Suwanwela, S. Tiamkao, R. Tulyapornchote, S. Boonyakarnkul, S. Hanchaiphiboolkul, S. Muengtaweepongsa, K. Watcharasaksilp, P. Sathirapanya, P. Pleumpanupat; Turkey: A. Oguz\*, A.A. Akalin, O.T. Caklilil, N. Isik, B. Caliskan, B. Sanlisoy, E. Balkuv, H. Tireli, V. Yayla, M. Cabalar, A. Culha, S. Senadim, B. Arpacı, C. Dayan, T. Argun, S. Yilmaz, S. Celiker, A. Kocer, T. Asil, G. Eryigit, Uganda: C. Mondo\*, J. Kayima, M. Nakisige, S. Kitoleeko; United Arab Emirates: A.M. Yusufali\*, B.J. Zuberi, H.Z. Mirza, A.A. Saleh, J.M. BinAdi, F. Hussain; United Kingdom: P. Langhorne\*, K. Muir, M. Walters, C. McAlpine, S. Ghosh, M. Barber, N. Hughes, M.J. MacLeod, S. Ghosh, A. Doney, S. Johnston, P. Mudd, T. Black, P. Murphy, D. Jenkinson, D. Kelly, R. Whiting, D. Dutta, L. Shaw, C. Mcfarlane, E. Ronald, K. McBurnie.

\*National coordinator.
