# Supplementary material for: Association of Lipids, Lipoproteins, and Apolipoproteins with Stroke Subtypes in an International Case Control Study (INTERSTROKE)
Source: PubMed Central journal article supplement — J Stroke. 2022 May 31;24(2):224–35. doi: 10.5853/jos.2021.02152 (PMC9194539; doi:10.5853/jos.2021.02152), 2022-05-31
Supplement: jos-2021-02152-suppl1.pdf [file jos-2021-02152-suppl1.pdf]

**Supplementary Table 1.** Exclusion criteria for cases

|   |                                                                                                                          |
|---|--------------------------------------------------------------------------------------------------------------------------|
| 1 | Age <18 years                                                                                                            |
| 2 | Patients unable to communicate because of severe stroke, aphasia, or dementia who did not have a valid proxy respondent* |
| 3 | Stroke symptoms lasting >120 hours from symptom onset or last seen normal                                                |
| 4 | Not first stroke presentation/diagnosis                                                                                  |
| 5 | Non-vascular causes of acute presentation (e.g., tumor, abscess, multiple sclerosis, hypoglycemia, seizure etc.)         |
| 6 | Subdural hemorrhage                                                                                                      |
| 7 | Current hospitalization for acute coronary syndromes or stroke secondary to endovascular procedure                       |
| 8 | Unable to get consent                                                                                                    |

\*A valid proxy respondent was considered a spouse or first degree relative who was living in the same home or aware of the participant's previous medical history and current therapies.

**Supplementary Table 2.** Guidance to sites for selection of controls

#### Selection of controls for INTERSTROKE study

##### Controls

1. Community-based control
2. Relative of a patient from a non-cardiac ward
3. Unrelated (not first degree relative) visitor of any patient
4. Patients attending the hospital or outpatient clinic:

Preferred controls from hospital settings: Patients attending the hospital or outpatients clinic for the following reasons

- 4.1 Refraction and cataracts (excluding those presenting with acute visual loss)
- 4.2 Physical check-up
- 4.3 Routine pap smear
- 4.4 Routine breast exam
- 4.5 Elective minor surgery for conditions that are not obviously related to stroke or its risk factors
- 4.6 Elective orthopedic surgery

Acceptable controls from hospital settings: Patients attending the hospital or outpatient's clinic for the following reasons

- 4.7 Outpatient fractures
- 4.8 Arthritic complaints
- 4.9 Plastic surgery
- 4.10 Hemorrhoids, hernias, hydroceles
- 4.11 Routine colon cancer screening
- 4.12 Endoscopy
- 4.13 Minor dermatological disorders
