# Supplementary material for: Association of Lipids, Lipoproteins, and Apolipoproteins with Stroke Subtypes in an International Case Control Study (INTERSTROKE)
Source: PubMed Central journal article supplement — J Stroke. 2022 May 31;24(2):224–35. doi: 10.5853/jos.2021.02152 (PMC9194539; doi:10.5853/jos.2021.02152), 2022-05-31
Supplement: jos-2021-02152-suppl2.pdf [file jos-2021-02152-suppl2.pdf]

**Supplementary Table 3.** Demographic and clinical characteristics of cases

| Characteristic             | Overall       | Western Europe | Eastern and Central Europe | Middle East | Africa     | South Asia   | China         | South East Asia | South America | North America and Australia |
|----------------------------|---------------|----------------|----------------------------|-------------|------------|--------------|---------------|-----------------|---------------|-----------------------------|
| Total                      | 13,462        | 1,503          | 1,037                      | 357         | 973        | 2,865        | 3,987         | 855             | 1,471         | 414                         |
| Age (yr)                   | 62.17±13.58   | 67.32±13.01    | 65.98±12.50                | 57.68±13.9  | 58.71±15.2 | 59.61±12.93  | 61.91±12.46   | 56.61±2.95      | 65.84±14.34   | 64.50±14.5                  |
| Women                      | 5,441 (40.4)  | 621 (41.3)     | 466 (44.)                  | 90 (25.2)   | 470 (48.3) | 1,024 (35.7) | 1,606 (40.3)  | 352 (41.2)      | 652 (44.3)    | 160 (38.7)                  |
| ICH stroke                 | 3,060 (22.7)  | 91 (6.05)      | 67 (6.46)                  | 50 (14.0)   | 294 (30.2) | 786 (27.4)   | 1,102 (27.6)  | 285 (33.3)      | 348 (23.7)    | 37 (8.94)                   |
| Ischemic stroke            | 10,402 (77.3) | 1,412 (94.0)   | 970 (93.5)                 | 307 (86.0)  | 679 (69.8) | 2,079 (72.6) | 2,885 (72.4)  | 570 (66.7)      | 1,123 (76.3)  | 377 (91.1)                  |
| Presumed primary etiology* |               |                |                            |             |            |              |               |                 |               |                             |
| Cardioembolism             | 1,198 (11.5)  | 309 (21.9)     | 231 (23.8)                 | 16 (5.2)    | 116 (17.1) | 105 (5.1)    | 37 (1.3)      | 54 (9.5)        | 225 (20.0)    | 105 (27.9)                  |
| Large vessel               | 2,119 (20.4)  | 301 (21.3)     | 400 (41.2)                 | 43 (14.0)   | 133 (19.6) | 527 (25.4)   | 438 (15.2)    | 84 (14.7)       | 125 (11.1)    | 68 (18.0)                   |
| Small vessel               | 4,007 (38.5)  | 416 (29.5)     | 170 (17.5)                 | 171 (55.7)  | 179 (26.4) | 935 (44.9)   | 1,620 (56.2)  | 191 (33.5)      | 228 (20.3)    | 97 (25.7)                   |
| Other                      | 770 (7.4)     | 35 (2.5)       | 11 (1.1)                   | 4 (1.3)     | 99 (14.6)  | 149 (7.2)    | 99 (3.43)     | 141 (24.7)      | 215 (19.2)    | 17 (4.0)                    |
| Undetermined               | 2,308 (22.2)  | 351 (24.9)     | 158 (16.3)                 | 73 (23.8)   | 152 (22.4) | 363 (17.5)   | 691 (24.0)    | 100 (17.5)      | 330 (29.4)    | 90 (23.9)                   |
| CT or MRI of brain         | 13,456 (99.9) | 1,503 (100.0)  | 1,037 (100.0)              | 357 (100.0) | 972 (99.9) | 2,860 (99.8) | 3,987 (100.0) | 855 (100.0)     | 1,471 (100.0) | 414 (100.0)                 |
| EKG                        | 13,356 (99.2) | 1,495 (99.5)   | 1,036 (99.9)               | 355 (99.4)  | 939 (96.5) | 2,835 (98.9) | 3,986 (99.9)  | 855 (100.0)     | 1,442 (98.0)  | 413 (99.8)                  |
| Vascular imaging*          | 4,169 (40.1)  | 1,193 (84.5)   | 701 (72.3)                 | 128 (41.7)  | 16 (2.4)   | 325 (15.6)   | 1,033 (35.8)  | 63 (11.1)       | 398 (35.4)    | 312 (82.8)                  |
| Transthoracic ECHO*        | 1,191 (11.4)  | 249 (17.6)     | 241 (24.9)                 | 18 (5.9)    | 72 (10.6)  | 16 (0.7)     | 280 (9.7)     | 9 (1.6)         | 140 (12.5)    | 166 (44.0)                  |
| Holter monitor*            | 750 (7.2)     | 302 (21.4)     | 198 (20.4)                 | 0 (0)       | 0 (0)      | 2 (0.1)      | 38 (1.3)      | 3 (0.5)         | 67 (6.0)      | 140 (37.1)                  |

Values are presented as mean±standard deviation or number (%).

ICH, intracerebral hemorrhage; CT, computed tomography; MRI, magnetic resonance imaging; ECG, electrocardiogram; ECHO, echocardiography.

\*% out of those who had ischemic stroke.
