# Supplementary material for: Association of Lipids, Lipoproteins, and Apolipoproteins with Stroke Subtypes in an International Case Control Study (INTERSTROKE)
Source: PubMed Central journal article supplement — J Stroke. 2022 May 31;24(2):224–35. doi: 10.5853/jos.2021.02152 (PMC9194539; doi:10.5853/jos.2021.02152), 2022-05-31
Supplement: jos-2021-02152-suppl3.pdf [file jos-2021-02152-suppl3.pdf]

**Supplementary Table 4.** Mean concentration of lipids, lipoproteins, apolipoproteins, and their ratios in controls (men and women) by region

| Variable                               | Total cholesterol (mmol/L) | HDL-C (mmol/L)   | LDL-C (mmol/L)   | LDL/HDL ratio    | ApoA1 (mg/dL)    | ApoB (mg/dL)     | ApoB/ApoA1       |
|----------------------------------------|----------------------------|------------------|------------------|------------------|------------------|------------------|------------------|
| <b>All</b>                             |                            |                  |                  |                  |                  |                  |                  |
| Overall                                | 4.65 (4.62–4.68)           | 1.10 (1.09–1.11) | 2.70 (2.67–2.72) | 2.44 (2.41–2.46) | 1.33 (1.32–1.34) | 0.93 (0.92–0.93) | 0.70 (0.69–0.71) |
| Western Europe/North America/Australia | 4.88 (4.80–4.95)           | 1.32 (1.30–1.35) | 2.69 (2.62–2.75) | 2.01 (1.96–2.06) | 1.42 (1.40–1.44) | 0.96 (0.95–0.98) | 0.68 (0.66–0.69) |
| E/CE Europe/ME                         | 4.79 (4.70–4.87)           | 1.13 (1.10–1.15) | 2.77 (2.70–2.84) | 2.44 (2.37–2.52) | 1.27 (1.25–1.30) | 0.99 (0.97–1.01) | 0.78 (0.76–0.80) |
| Africa                                 | 4.30 (4.19–4.40)           | 1.04 (1.01–1.08) | 2.45 (2.37–2.54) | 2.34 (2.24–2.44) | 1.26 (1.23–1.30) | 0.95 (0.93–0.98) | 0.75 (0.73–0.78) |
| South Asia                             | 3.92 (3.85–3.99)           | 0.86 (0.84–0.89) | 2.29 (2.24–2.35) | 2.67 (2.59–2.76) | 1.08 (1.07–1.10) | 0.83 (0.82–0.85) | 0.78 (0.76–0.80) |
| China                                  | 4.96 (4.92–5.00)           | 1.17 (1.15–1.18) | 2.99 (2.95–3.03) | 2.56 (2.52–2.60) | 1.51 (1.50–1.52) | 0.92 (0.91–0.93) | 0.61 (0.60–0.62) |
| South East Asia                        | 4.88 (4.78–4.99)           | 1.09 (1.06–1.12) | 2.82 (2.72–2.91) | 2.55 (2.45–2.65) | 1.27 (1.24–1.30) | 0.97 (0.95–0.99) | 0.76 (0.74–0.79) |
| South America                          | 4.61 (4.53–4.70)           | 1.08 (1.06–1.10) | 2.56 (2.48–2.63) | 2.35 (2.28–2.42) | 1.26 (1.24–1.28) | 0.97 (0.95–0.99) | 0.77 (0.75–0.79) |
| <b>Men</b>                             |                            |                  |                  |                  |                  |                  |                  |
| Overall                                | 4.50 (4.47–4.54)           | 1.04 (1.03–1.05) | 2.61 (2.58–2.64) | 2.51 (2.47–2.54) | 1.27 (1.26–1.28) | 0.91 (0.90–0.92) | 0.72 (0.71–0.73) |
| W Europe/North America                 | 4.64 (4.55–4.73)           | 1.19 (1.16–1.22) | 2.55 (2.47–2.63) | 2.12 (2.05–2.19) | 1.33 (1.31–1.35) | 0.94 (0.92–0.96) | 0.71 (0.69–0.73) |
| E/CE Europe/ME                         | 4.64 (4.53–4.75)           | 1.05 (1.02–1.08) | 2.68 (2.59–2.78) | 2.55 (2.45–2.65) | 1.19 (1.16–1.22) | 0.98 (0.96–1.01) | 0.82 (0.79–0.85) |
| Africa                                 | 4.15 (4.01–4.30)           | 0.99 (0.95–1.04) | 2.36 (2.25–2.48) | 2.36 (2.22–2.49) | 1.22 (1.18–1.26) | 0.92 (0.89–0.96) | 0.75 (0.72–0.79) |
| South Asia                             | 3.84 (3.76–3.93)           | 0.84 (0.81–0.87) | 2.25 (2.18–2.31) | 2.70 (2.59–2.81) | 1.06 (1.03–1.08) | 0.83 (0.81–0.84) | 0.79 (0.77–0.81) |
| China                                  | 4.84 (4.79–4.89)           | 1.12 (1.10–1.14) | 2.91 (2.86–2.95) | 2.59 (2.54–2.65) | 1.46 (1.44–1.47) | 0.91 (0.90–0.92) | 0.62 (0.61–0.63) |
| South East Asia                        | 4.80 (4.66–4.94)           | 1.03 (0.99–1.07) | 2.78 (2.67–2.91) | 2.67 (2.54–2.81) | 1.21 (1.17–1.24) | 0.97 (0.94–1.00) | 0.80 (0.77–0.84) |
| South America                          | 4.45 (4.34–4.56)           | 1.00 (0.97–1.02) | 2.48 (2.38–2.58) | 2.46 (2.36–2.56) | 1.19 (1.16–1.22) | 0.95 (0.93–0.98) | 0.80 (0.78–0.83) |
| <b>Women</b>                           |                            |                  |                  |                  |                  |                  |                  |
| Overall                                | 4.87 (4.82–4.91)           | 1.20 (1.19–1.22) | 2.82 (2.78–2.86) | 2.34 (2.30–2.38) | 1.42 (1.41–1.44) | 0.95 (0.94–0.96) | 0.67 (0.66–0.68) |
| W Europe/North America                 | 5.25 (5.15–5.36)           | 1.55 (1.51–1.59) | 2.90 (2.80–3.00) | 1.87 (1.80–1.94) | 1.58 (1.55–1.61) | 1.00 (0.97–1.02) | 0.63 (0.61–0.65) |
| E/CE Europe/ME                         | 5.02 (4.89–5.15)           | 1.26 (1.21–1.30) | 2.90 (2.79–3.02) | 2.30 (2.20–2.42) | 1.41 (1.37–1.45) | 1.01 (0.98–1.04) | 0.72 (0.69–0.75) |
| Africa                                 | 4.46 (4.31–4.61)           | 1.10 (1.05–1.15) | 2.56 (2.43–2.69) | 2.32 (2.19–2.47) | 1.31 (1.27–1.36) | 0.99 (0.95–1.03) | 0.76 (0.72–0.80) |
| South Asia                             | 4.06 (3.95–4.18)           | 0.91 (0.87–0.94) | 2.38 (2.30–2.48) | 2.63 (2.49–2.77) | 1.14 (1.10–1.17) | 0.85 (0.82–0.88) | 0.75 (0.73–0.78) |
| China                                  | 5.15 (5.08–5.22)           | 1.24 (1.21–1.26) | 3.11 (3.05–3.17) | 2.51 (2.45–2.58) | 1.59 (1.57–1.61) | 0.94 (0.92–0.96) | 0.59 (0.58–0.60) |
| South East Asia                        | 5.01 (4.85–5.18)           | 1.19 (1.14–1.24) | 2.87 (2.72–3.03) | 2.39 (2.25–2.55) | 1.36 (1.31–1.40) | 0.97 (0.93–1.01) | 0.72 (0.68–0.76) |
| South America                          | 4.81 (4.68–4.94)           | 1.18 (1.15–1.22) | 2.65 (2.54–2.76) | 2.22 (2.12–2.32) | 1.35 (1.31–1.39) | 0.99 (0.97–1.02) | 0.74 (0.71–0.76) |

Values are presented as mean (95% confidence interval [CI]) based on log transformed data and then back transformed to the original scale to reflect skewed distribution of some of the measures. CIs are not necessarily symmetric about the mean value.

HDL-C, high-density lipoprotein cholesterol; LDL-C, low-density lipoprotein cholesterol; Apo, apolipoprotein; E/CE, Eastern/Central Europe; ME, Middle-East.
