# Supplementary material for: Association of Lipids, Lipoproteins, and Apolipoproteins with Stroke Subtypes in an International Case Control Study (INTERSTROKE)
Source: PubMed Central journal article supplement — J Stroke. 2022 May 31;24(2):224–35. doi: 10.5853/jos.2021.02152 (PMC9194539; doi:10.5853/jos.2021.02152), 2022-05-31
Supplement: jos-2021-02152-suppl4.pdf [file jos-2021-02152-suppl4.pdf]

**Supplementary Table 5.** Adjusted mean concentration of lipids, lipoproteins, apolipoproteins, and their ratios in cases and controls

| Variable                      | Ischemic stroke (n=9,169) | Intracerebral hemorrhage (n=2,729) | Controls (n=11,898) |
|-------------------------------|---------------------------|------------------------------------|---------------------|
| Total cholesterol (mmol/L)    | 4.61 (4.55–4.67)          | 4.56 (4.47–4.64)                   | 4.72 (4.65–4.78)    |
| HDL-C (mmol/L)                | 1.12 (1.10–1.14)          | 1.27 (1.24–1.29)                   | 1.20 (1.18–1.22)    |
| Non-HDL-C (mmol/L)            | 3.49 (3.43–3.55)          | 3.29 (3.21–3.37)                   | 3.52 (3.46–3.58)    |
| ApoA1 (g/L)                   | 1.27 (1.25–1.29)          | 1.33 (1.31–1.35)                   | 1.38 (1.36–1.40)    |
| ApoB (g/L)                    | 0.99 (0.97–1.01)          | 0.95 (0.93–0.97)                   | 0.97 (0.95–0.99)    |
| Total cholesterol/HDL-C ratio | 4.53 (4.43–4.63)          | 3.91 (3.78–4.04)                   | 4.34 (4.23–4.44)    |
| ApoB/apoA1 ratio              | 0.84 (0.82–0.86)          | 0.77 (0.75–0.79)                   | 0.76 (0.74–0.78)    |
| Non-HDL-C/HDL-C ratio         | 3.53 (3.43–3.63)          | 2.91 (2.78–3.04)                   | 3.34 (3.23–3.44)    |

Values are presented as least square mean (95% confidence interval) after adjustment for age, sex, region, smoking, waist-to-hip ratio, diabetes, physical activity, alternate healthy eating index, alcohol intake, psychosocial factors, and cardiac risk factors.

HDL-C, high-density lipoprotein cholesterol; Apo, apolipoprotein.
