# Supplementary material for: Association of Lipids, Lipoproteins, and Apolipoproteins with Stroke Subtypes in an International Case Control Study (INTERSTROKE)
Source: PubMed Central journal article supplement — J Stroke. 2022 May 31;24(2):224–35. doi: 10.5853/jos.2021.02152 (PMC9194539; doi:10.5853/jos.2021.02152), 2022-05-31
Supplement: jos-2021-02152-suppl9.pdf [file jos-2021-02152-suppl9.pdf]

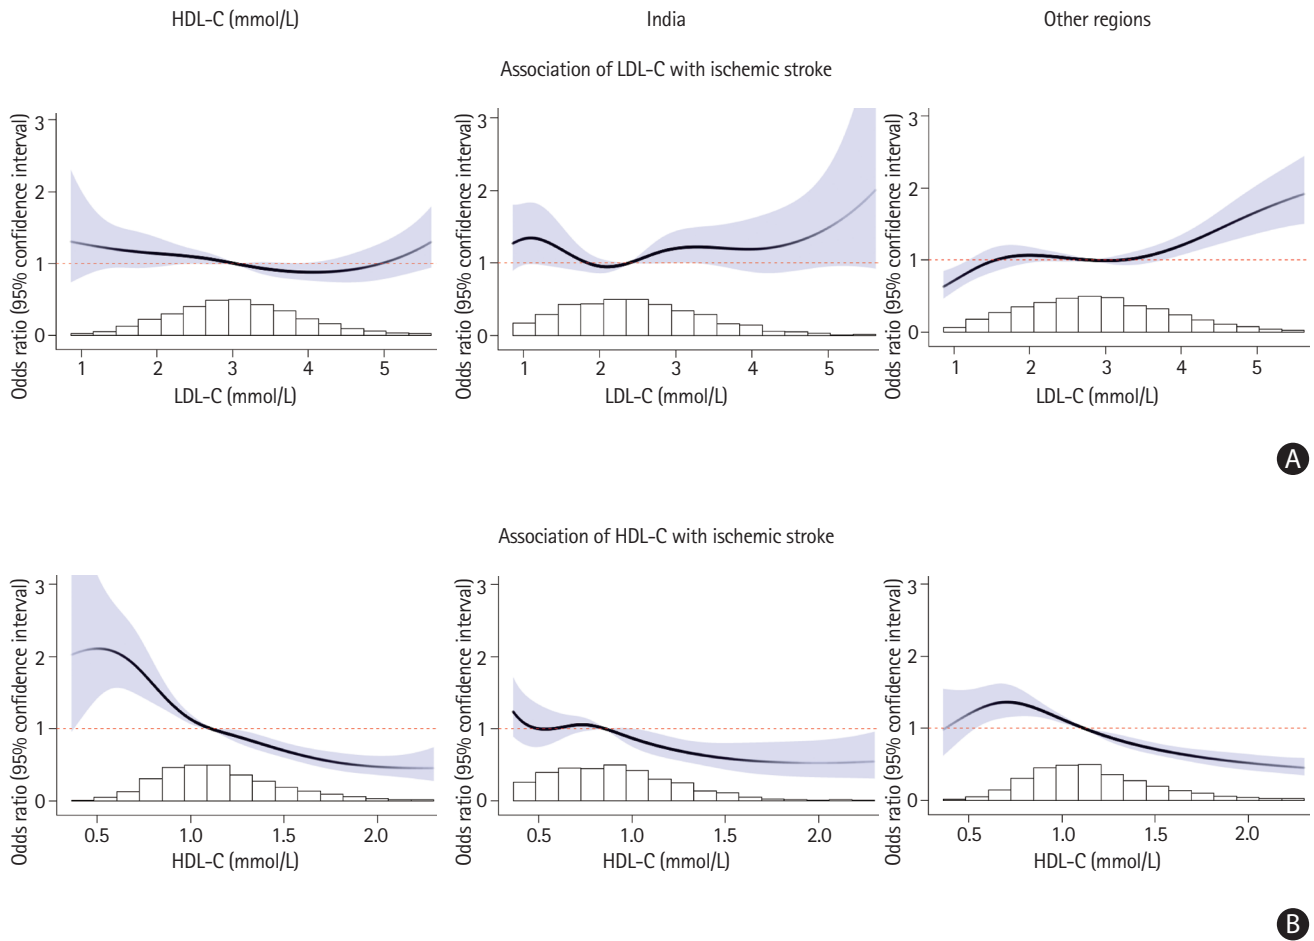

**Supplementary Figure 5.** Association of lipoproteins with ischemic stroke (China, India, and all other regions). Restricted cubic spline plot of association of lipoproteins (A: low-density lipoprotein cholesterol [LDL-C]; B: high-density lipoprotein cholesterol [HDL-C]) (X-axis) with intracerebral hemorrhage by China, India, and other regions of the world. Spline curves truncated at highest and lowest 2% of values. Light blue shading denotes 95% confidence interval. All splines adjusted for age, sex, geographic region, and potential confounders (smoking, diabetes mellitus, physical activity, diet, psychosocial factors, waist-to-hip ratio, and alcohol intake).
