# Supplementary material for: Association of Lipids, Lipoproteins, and Apolipoproteins with Stroke Subtypes in an International Case Control Study (INTERSTROKE)
Source: PubMed Central journal article supplement — J Stroke. 2022 May 31;24(2):224–35. doi: 10.5853/jos.2021.02152 (PMC9194539; doi:10.5853/jos.2021.02152), 2022-05-31
Supplement: jos-2021-02152-suppl10.pdf [file jos-2021-02152-suppl10.pdf]

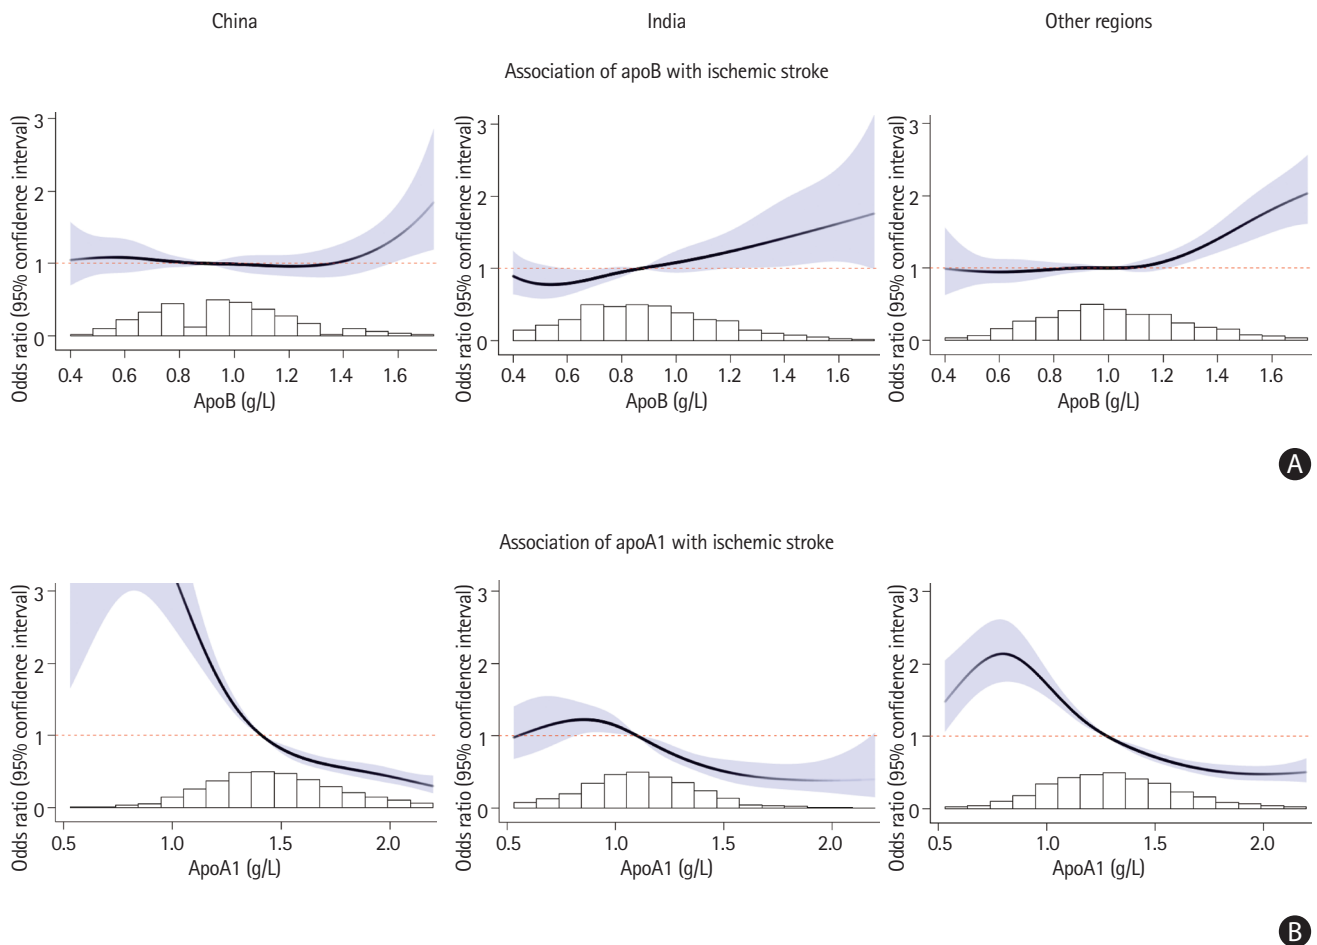

**Supplementary Figure 6.** Association of apolipoproteins with ischemic stroke (China, India, and all other regions). Restricted cubic spline plot of association of apolipoproteins (A: apoB; B: apoA1) (X-axis) with ischemic stroke by China, India, and other regions of the world. Spline curves truncated at highest and lowest 2% of values. Light blue shading denotes 95% confidence interval. All splines adjusted for age, sex, geographic region, and potential confounders (smoking, diabetes mellitus, physical activity, diet, psychosocial factors, waist-to-hip ratio, and alcohol intake).
